# Supplementary material
Source: PubMed Central journal article supplement (PMC2736411)
Supplement: 0901221106_0901221106SI.pdf [file 0901221106_0901221106SI.pdf]

# Supporting Information

Kaadige et al. 10.1073/pnas.0901221106

## SI Methods

**Metabolite Extraction.** To each cell pellet suspended in 100  $\mu\text{L}$  buffer was added 900  $\mu\text{L}$   $-40^\circ\text{C}$  MeOH containing an internal standard solution consisting of the following  $\text{U-}^{13}\text{C-}$ ,  $\text{U-}^{15}\text{N-}$  labeled amino acids: Aspartic acid, glutamic acid, asparagine, serine, glutamine, histidine, glycine, threonine alanine, arginine, tyrosine, valine, methionine, tryptophan, phenylalanine, isoleucine, leucine, lysine, proline, and cysteine. The mixture was mixed by vortex for 30 s and then sonicated for 30 s using a bath sonicator (Model 2510; Branson). Cellular debris was removed by centrifugation ( $16,000 \times g$  for 5 min at  $-20^\circ\text{C}$ ). The supernatant was transferred to a fresh microfuge tube, and the solvent removed *en vacuo* overnight using a MiVac Duo Concentrator (Genevac).

**Metabolite Derivatization.** To ensure metabolite volatility for gas chromatographic analysis, each sample underwent a two-step derivatization process. The extracted metabolites were suspended in 50  $\mu\text{L}$  pyridine containing *O*-methylhydroxylamine (20 mg/mL; Sigma-Aldrich) and incubated at  $60^\circ\text{C}$  for 30 min. This was followed by the addition of 50  $\mu\text{L}$  *N*-methyl-*N*-trimethylsilyltrifluoroacetamide plus 1% trimethylchlorosilane (Pierce). This mixture was incubated at  $37^\circ\text{C}$  for 30 min. After derivatization, the solution was immediately transferred to an auto sampler vial containing 10  $\mu\text{L}$  of a fatty acid methyl ester solution used as a retention index standard.

**GC-MS Analysis.** An Agilent 7683 auto injector was used to add 1  $\mu\text{L}$  of each sample into the injector set to a 2:1 split ratio. An Agilent 6890 gas chromatograph was used for analysis. A Restek 30-m Rtx-5MS with a 10-m guard column was used for separation. Helium was used as the carrier gas with the flow rate set to 1 mL/min. The oven was programmed for an initial temperature of  $70^\circ\text{C}$  for 1 min followed by an  $8^\circ\text{C}/\text{min}$  ramp to  $250^\circ\text{C}$ . A second temperature ramp of  $20^\circ\text{C}/\text{min}$  was used to a final temperature of  $330^\circ\text{C}$  holding for 3 min. The transfer line into the mass spectrometer was held at  $250^\circ\text{C}$ . A MicroMass GCT Premier (Waters) time-of-flight mass spectrometric was used for analysis. Normal  $-70$  eV electron impact conditions were used for fragmentation. Data were recorded using MassLynx version 4.1 (Waters).

**Data Analysis.** Chromatographic peak detection and height analysis for each chromatogram was performed using MarkerLynx (Waters). To find possible variation in each sample group, the data were transferred to SIMCA-P+ ver.12.0 (Umetrics), where principle component analysis (PCA) and partial least squares-discriminate analysis (PLS-DA) were performed. This produced a possible list of metabolites that had changed because of treatment. Each metabolite was investigated further using Excel (Microsoft) for spreadsheet development. Significance testing was performed using JMP Pro version 7 (SAS).

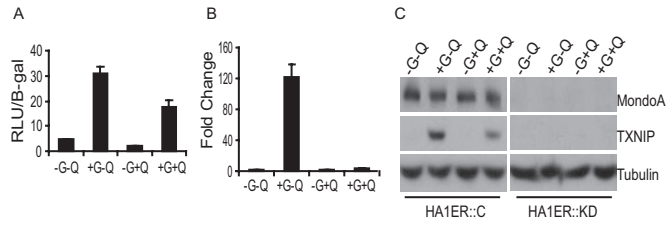

**Fig. S1.** Glutamine represses TXNIP at the transcriptional level. (A) Expression of TXNIP-Luciferase reporter gene was determined by Luciferase assay system in HA1ER cells cultured under the indicated growth conditions. (B) qRT-PCR was used to determine the relative expression of *TXNIP* in A549::C cells cultured under the indicated growth conditions. The normalized (*β-actin*) data are presented as fold change relative to the starved condition (-G-Q). (C) Expression of MondoA, TXNIP, and Tubulin in HA1ER::C and HA1ER::KD cells cultured under the indicated growth conditions was determined by western blotting.

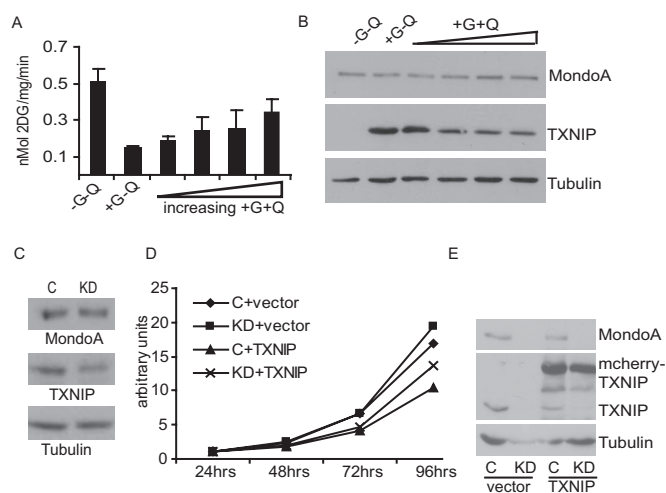

**Fig. S2.** TXNIP levels dictate glucose uptake and cell proliferation. (A) Glucose uptake was determined in BxPC-3 cells cultured in different concentrations of glutamine. (B) Expression of MondoA, TXNIP, and Tubulin in BxPC-3 cells cultured under the indicated growth conditions was determined by western blotting. Glutamine was used at 0.0, 0.1, 0.5, 1.0, 2.0, and 5.0 mM concentration. (C) Expression of MondoA, TXNIP, and Tubulin in control "C" and TXNIP knockdown "KD" BxPC-3 cells was determined by western blotting. (D) Cell proliferation was performed as described in Fig. 1A in control "C" and MondoA knockdown "KD" HA1ER cells expressing mCherry vector or mCherry-TXNIP. (E) Expression of MondoA, TXNIP, and Tubulin in control "C" and MondoA knockdown "KD" HA1ER cells expressing mCherry vector or mCherry-TXNIP was determined by western blotting.

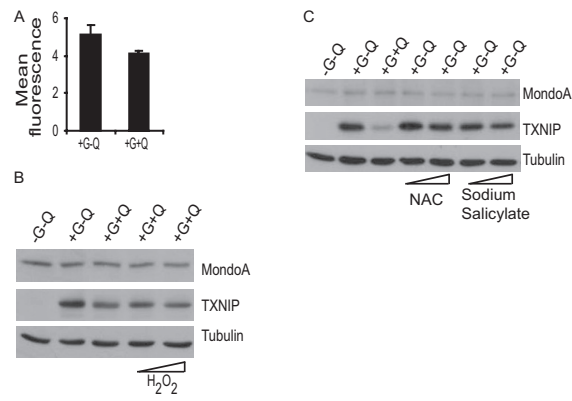

**Fig. S3.** TXNIP expression is not significantly affected by reactive oxygen species. (A) ROS levels in BxPC-3 cells were measured as mean fluorescence of CM-H<sub>2</sub>DCFDA (Invitrogen) under the indicated growth conditions. (B and C) expression MondoA, TXNIP, and Tubulin in BxPC-3 cells grown under the indicated conditions were determined by western blotting. All treatments were 16 h. In panel B, H<sub>2</sub>O<sub>2</sub>, an ROS miming, was used at 0.1 and 0.5 mM. In panel C, N-acetyl cysteine (NAC) and sodium salicylate, both anti-oxidants, were used 0.5 and 1 mM.

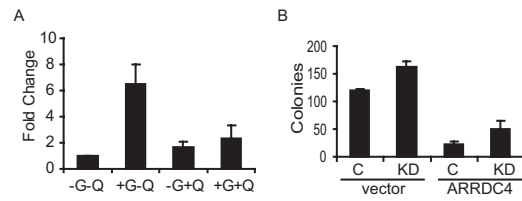

**Fig. 54.** ARRDC4 is a MondoA effector. (A) qRT-PCR was used to determine the relative expression of *ARRDC4*, normalized to  $\beta$ -actin, in BxPC-3 cells cultured under the indicated growth conditions. (B) Anchorage-independent growth of control “C” and MondoA knockdown “KD” HA1ER cells expressing mCherry vector or mCherry-ARRDC4.

**Table S1. Genes and pathways regulated by glucose and/or glutamine**

| (Glucose + Glutamine upregulated, 1014 genes)               | List | Array | z-score |
|-------------------------------------------------------------|------|-------|---------|
| Cell cycle                                                  | 20   | 113   | 7.89    |
| CD45 cell division cycle 45-like ( <i>S.cerevisiae</i> )    |      |       |         |
| Cell division cycle 25 homology ( <i>S.pombe</i> )          |      |       |         |
| Cell division cycle 6 homology ( <i>S.cerevisiae</i> )      |      |       |         |
| Cell division cycle 7 homology ( <i>S.cerevisiae</i> )      |      |       |         |
| Cyclin E1                                                   |      |       |         |
| Cyclin E2                                                   |      |       |         |
| Cyclin-dependent kinase inhibitor 2C (p18, inhibits CDK4)   |      |       |         |
| E2F transcription factor 1                                  |      |       |         |
| Minichromosome maintenance complex component 2              |      |       |         |
| Minichromosome maintenance complex component 3              |      |       |         |
| Minichromosome maintenance complex component 4              |      |       |         |
| Minichromosome maintenance complex component 5              |      |       |         |
| Minichromosome maintenance complex component 6              |      |       |         |
| Minichromosome maintenance complex component 7              |      |       |         |
| Origin recognition complex, subunit 1-like (yeast)          |      |       |         |
| Proliferating cell nuclear antigen                          |      |       |         |
| Protein kinase, membrane associated tyrosine/threonine 1    |      |       |         |
| Retinoblastoma-like 1 (p107)                                |      |       |         |
| S-phase kinase-associated protein 2 (p45)                   |      |       |         |
| Structural maintenance of chromosomes 1A                    |      |       |         |
| DNA polymerase                                              | 7    | 25    | 6.38    |
| Polymerase (DNA directed), alpha 1                          |      |       |         |
| Polymerase (DNA directed), alpha 2 (70kD subunit)           |      |       |         |
| Polymerase (DNA directed), epsilon 2 (p59 subunit)          |      |       |         |
| Polymerase (DNA directed), theta                            |      |       |         |
| Polymerase (DNA directed), delta 3, accessory subunit       |      |       |         |
| Primase, DNA, polypeptide 1 (49kDa)                         |      |       |         |
| Replication factor C (activator 1) 5, 36.5kDa               |      |       |         |
| Pathogenic <i>Escherichia coli</i> infection - EHEC         | 10   | 49    | 6.15    |
| Toll-like receptor 4                                        |      |       |         |
| Tubulin, alpha 1b                                           |      |       |         |
| Tubulin, alpha 3c                                           |      |       |         |
| Tubulin, alpha 4a                                           |      |       |         |
| Tubulin, beta                                               |      |       |         |
| Tubulin, beta 2A                                            |      |       |         |
| Tubulin, beta 2C                                            |      |       |         |
| Tubulin, beta 3                                             |      |       |         |
| Tubulin, beta 6                                             |      |       |         |
| Tubulin, beta 8                                             |      |       |         |
| 1, 4-Dichlorobenzene degradation                            | 1    | 1     | 5.05    |
| Carboxymethylenebutenolidase homolog ( <i>Pseudomonas</i> ) |      |       |         |
| Pyrimidine metabolism                                       | 11   | 85    | 4.49    |
| Deoxyuridine triphosphatase                                 |      |       |         |
| Dihydropyrimidine dehydrogenase                             |      |       |         |
| Polymerase (DNA directed), alpha 1                          |      |       |         |
| Polymerase (DNA directed), alpha 2 (70kD subunit)           |      |       |         |
| Polymerase (DNA directed), epsilon 2 (p59 subunit)          |      |       |         |
| Polymerase (DNA directed), delta 3, accessory subunit       |      |       |         |
| Primase, DNA, polypeptide 1 (49kDa)                         |      |       |         |
| Replication factor C (activator 1) 5, 36.5kDa               |      |       |         |
| Ribonucleotide reductase M2 polypeptide                     |      |       |         |
| Thymidine kinase 1, soluble                                 |      |       |         |
| Thymidylate synthetase                                      |      |       |         |
| Gap Junction                                                | 10   | 91    | 3.66    |
| Platelet-derived growth factor receptor, alpha polypeptide  |      |       |         |
| Tubulin, alpha 1b                                           |      |       |         |
| Tubulin, alpha 3c                                           |      |       |         |
| Tubulin, alpha 4a                                           |      |       |         |
| Tubulin, beta                                               |      |       |         |
| Tubulin, beta 2A                                            |      |       |         |
| Tubulin, beta 2C                                            |      |       |         |
| Tubulin, beta 3                                             |      |       |         |
| Tubulin, beta 6                                             |      |       |         |

| (Glucose + Glutamine upregulated, 1014 genes)                                | List | Array | z-score |
|------------------------------------------------------------------------------|------|-------|---------|
| Tubulin, beta 8                                                              |      |       |         |
| Synthesis and degradation of ketone bodies                                   | 2    | 8     | 3.16    |
| 3-hydroxy-3-methylglutaryl-Coenzyme A synthase (soluble)                     |      |       |         |
| Acetyl-Coenzyme A acetyltransferase 2                                        |      |       |         |
| Tetrachloroethene degradation                                                | 2    | 8     | 3.16    |
| Aldo-keto reductase family 1, member B10 (aldose reductase)                  |      |       |         |
| Epoxide hydrolase 2, cytoplasmic                                             |      |       |         |
| One carbon pool by folate                                                    | 3    | 16    | 3.15    |
| Dihydrofolate reductase                                                      |      |       |         |
| Serine hydroxymethyltransferase 1 (soluble)                                  |      |       |         |
| Thymidylate synthetase                                                       |      |       |         |
| Glycosphingolipid biosynthesis - lactoseries                                 | 2    | 10    | 2.7     |
| ABO blood group (transferase A, alpha 1-3-N-acetylgalactosaminyltransferase) |      |       |         |
| ST3 beta-galactoside alpha-2,3-sialyltransferase 4                           |      |       |         |
| Methane metabolism                                                           | 2    | 10    | 2.7     |
| Catalase                                                                     |      |       |         |
| Serine hydroxymethyltransferase 1 (soluble)                                  |      |       |         |
| Glycine, serine and threonine metabolism                                     | 5    | 46    | 2.54    |
| Aldo-keto reductase family 1, member B10 (aldose reductase)                  |      |       |         |
| Choline dehydrogenase                                                        |      |       |         |
| Guanidinoacetate N-methyltransferase                                         |      |       |         |
| Monoamine oxidase B                                                          |      |       |         |
| Serine hydroxymethyltransferase 1 (soluble)                                  |      |       |         |
| 1- and 2-Methylnaphthalene degradation                                       | 3    | 22    | 2.44    |
| Alcohol dehydrogenase 7 (class IV), mu or sigma polypeptide                  |      |       |         |
| Establishment of cohesion 1 homolog 2 ( <i>S. cerevisiae</i> )               |      |       |         |
| Biosynthesis of steroids                                                     | 3    | 22    | 2.44    |
| 24-dehydrocholesterol reductase                                              |      |       |         |
| 7-dehydrocholesterol reductase                                               |      |       |         |
| Lanosterol synthase (2,3-oxidosqualene-lanosterol cyclase)                   |      |       |         |
| Glycosylphosphatidylinositol (GPI)-anchor biosynthesis                       | 3    | 23    | 2.34    |
| Phosphatidylinositol glycan anchor biosynthesis, class M                     |      |       |         |
| Phosphatidylinositol glycan anchor biosynthesis, class W                     |      |       |         |
| Phosphatidylinositol glycan anchor biosynthesis, class Z                     |      |       |         |
| Nitrogen metabolism                                                          | 3    | 23    | 2.34    |
| Carbonic anhydrase II                                                        |      |       |         |
| Carbonic anhydrase IX                                                        |      |       |         |
| Histidine ammonia-lyase                                                      |      |       |         |
| MAPK signaling pathway                                                       | 3    | 255   | -2.25   |
| Arrestin, beta 1                                                             |      |       |         |
| Mitogen-activated protein kinase kinase 6                                    |      |       |         |
| Platelet-derived growth factor receptor, alpha polypeptide                   |      |       |         |
| Retinol metabolism                                                           | 1    | 4     | 2.23    |
| Aldehyde dehydrogenase 1 family, member A1                                   |      |       |         |
| Ethylbenzene degradation                                                     | 2    | 13    | 2.2     |
| Establishment of cohesion 1 homolog 2 ( <i>S. cerevisiae</i> )               |      |       |         |
| Patatin-like phospholipase domain containing 3                               |      |       |         |
| Folate biosynthesis                                                          | 4    | 39    | 2.14    |
| Dihydrofolate reductase                                                      |      |       |         |
| Nudix (nucleoside diphosphate linked moiety X)-type motif 8                  |      |       |         |
| RAD54 homolog B ( <i>S. cerevisiae</i> )                                     |      |       |         |
| RAD54-like ( <i>S. cerevisiae</i> )                                          |      |       |         |
| Benzoate degradation via CoA ligation                                        | 3    | 26    | 2.09    |
| Acetyl-Coenzyme A acetyltransferase 2                                        |      |       |         |
| Establishment of cohesion 1 homolog 2 ( <i>S. cerevisiae</i> )               |      |       |         |
| Patatin-like phospholipase domain containing 3                               |      |       |         |
| (Glutamine upregulated, 662 genes)                                           |      |       |         |
| One carbon pool by folate                                                    | 4    | 16    | 4.99    |
| Aldehyde dehydrogenase 1 family, member L1                                   |      |       |         |
| Dihydrofolate reductase                                                      |      |       |         |
| Serine hydroxymethyltransferase 1 (soluble)                                  |      |       |         |
| Thymidylate synthetase                                                       |      |       |         |
| Biosynthesis of steroids                                                     | 4    | 22    | 4.02    |
| 24-dehydrocholesterol reductase                                              |      |       |         |
| 7-dehydrocholesterol reductase                                               |      |       |         |

| (Glucose + Glutamine upregulated, 1014 genes)                                 | List | Array | z-score |
|-------------------------------------------------------------------------------|------|-------|---------|
| Isopentenyl-diphosphate delta isomerase 1                                     |      |       |         |
| Lanosterol synthase (2,3-oxidosqualene-lanosterol cyclase)                    |      |       |         |
| Synthesis and degradation of ketone bodies                                    | 2    | 8     | 3.52    |
| 3-hydroxy-3-methylglutaryl-Coenzyme A synthase 1 (soluble)                    |      |       |         |
| Acetyl-Coenzyme A acetyltransferase 2                                         |      |       |         |
| Alanine and aspartate metabolism                                              | 4    | 32    | 3.02    |
| Adenylosuccinate synthase like 1                                              |      |       |         |
| Argininosuccinate lyase                                                       |      |       |         |
| Argininosuccinate synthetase 1                                                |      |       |         |
| Glutamic-oxaloacetic transaminase 1, soluble (aspartate aminotransferase 1)   |      |       |         |
| Novobiocin biosynthesis                                                       | 1    | 3     | 2.98    |
| Glutamic-oxaloacetic transaminase 1, soluble (aspartate aminotransferase 1)   |      |       |         |
| Cytokine-cytokine receptor interaction                                        | 14   | 247   | 2.3     |
| Chemokine (C-C motif) ligand 20                                               |      |       |         |
| Chemokine (C-X-C motif) ligand 1 (melanoma growth stimulating activity alpha) |      |       |         |
| Chemokine (C-X-C motif) ligand 14                                             |      |       |         |
| Chemokine (C-X-C motif) ligand 2                                              |      |       |         |
| Chemokine (C-X-C motif) ligand 3                                              |      |       |         |
| Chemokine (C-X-C motif) receptor 3                                            |      |       |         |
| Chemokine (C-X-C motif) receptor 4                                            |      |       |         |
| Colony stimulating factor 3 (granulocyte)                                     |      |       |         |
| Interleukin 10 receptor, alpha                                                |      |       |         |
| Interleukin 17 receptor B                                                     |      |       |         |
| Interleukin 8                                                                 |      |       |         |
| Platelet-derived growth factor receptor, alpha polypeptide                    |      |       |         |
| Tumor necrosis factor (ligand) superfamily, member 9                          |      |       |         |
| Tumor necrosis factor receptor superfamily, member 6b, decoy                  |      |       |         |
| Type II diabetes mellitus                                                     | 4    | 43    | 2.3     |
| Adiponectin, C1Q and collagen domain containing                               |      |       |         |
| Calcium channel, voltage-dependent, R type, alpha 1E subunit                  |      |       |         |
| Protein kinase C, zeta                                                        |      |       |         |
| Suppressor of cytokine signaling 1                                            |      |       |         |
| Alkaloid biosynthesis I                                                       | 1    | 5     | 2.15    |
| Glutamic-oxaloacetic transaminase 1, soluble (aspartate aminotransferase 1)   |      |       |         |
| Terpenoid biosynthesis                                                        | 1    | 5     | 2.15    |
| Isopentenyl-diphosphate delta isomerase 1                                     |      |       |         |
| Glutamate metabolism                                                          | 3    | 30    | 2.14    |
| Glutamate-cysteine ligase, modifier subunit                                   |      |       |         |
| Glutamic-oxaloacetic transaminase 1, soluble (aspartate aminotransferase 1)   |      |       |         |
| Glutamic-fructose-6-phosphate transaminase 1                                  |      |       |         |
| Complement and coagulation cascades                                           | 5    | 67    | 2.02    |
| Complement component 1, r subcomponent                                        |      |       |         |
| Complement component 1, s subcomponent                                        |      |       |         |
| Complement component 3                                                        |      |       |         |
| Complement factor B                                                           |      |       |         |
| Plasminogen activator, tissue                                                 |      |       |         |
| (Glucose upregulated, 73 genes)                                               |      |       |         |
| Keratan sulfate biosynthesis                                                  | 1    | 16    | 4.11    |
| Carbohydrate (N-acetylglucosamine 6-O) sulfotransferase                       |      |       |         |
| Renin-angiotensin system                                                      | 1    | 17    | 3.98    |
| Alanyl (membrane) aminopeptidase                                              |      |       |         |
| B cell receptor signaling pathway                                             | 2    | 63    | 3.94    |
| Inositol polyphosphate-5-phosphatase                                          |      |       |         |
| Vav 3 guanine nucleotide exchange factor                                      |      |       |         |
| Fc epsilon RI signaling pathway                                               | 2    | 74    | 3.57    |
| Inositol polyphosphate-5-phosphatase                                          |      |       |         |
| Vav 3 guanine nucleotide exchange factor                                      |      |       |         |
| Neuroactive ligand-receptor interaction                                       | 4    | 300   | 3.13    |
| Dopamine receptor D5                                                          |      |       |         |
| Gonadotropin-releasing hormone receptor                                       |      |       |         |
| Growth hormone receptor                                                       |      |       |         |
| Opioid receptor, kappa 1                                                      |      |       |         |
| Natural killer cell mediated cytotoxicity                                     | 2    | 119   | 2.59    |
| Tumor necrosis factor (ligand) superfamily, member 10                         |      |       |         |
| Vav 3 guanine nucleotide exchange factor                                      |      |       |         |



| (Glucose + Glutamine upregulated, 1014 genes)              | List | Array | z-score |
|------------------------------------------------------------|------|-------|---------|
| Cytokine-cytokine receptor interaction                     | 3    | 247   | 2.48    |
| Growth hormone receptor                                    |      |       |         |
| Platelet-derived growth factor receptor, alpha polypeptide |      |       |         |
| Tumor necrosis factor (ligand) superfamily, member 10      |      |       |         |
| Glutathione metabolism                                     | 1    | 39    | 2.43    |
| Alanyl (membrane) aminopeptidase                           |      |       |         |

Genome-wide expression analysis in BxPC-3 cells. Genes up-regulated >2-fold in glucose only, glutamine only, or glucose plus glutamine media are presented. See text for details.
